# Supplementary material for: The cost of illness and economic burden of endometriosis and chronic pelvic pain in Australia: A national online survey
Source: PubMed Central journal article supplement (PMC6786587; doi:10.1371/journal.pone.0223316), 2019-10-10
Supplement: pone.0223316.s005.pdf [file pone.0223316.s005.pdf]

|              |               | Endometriosis  |               |             |               |             |               |             |               |                  |               |             |
|--------------|---------------|----------------|---------------|-------------|---------------|-------------|---------------|-------------|---------------|------------------|---------------|-------------|
| Age range    |               | 18-24          |               | 25-30       |               | 31-38       |               | 39+         |               | All ages - total |               |             |
| Health       | Primary       | 930            | (597,1200)    | 672         | (483,1051)    | 1,055       | (597,1410)    | 835         | (503,1076)    | 883              | (708,1102)    |             |
|              | Secondary     | 768            | (535,1075)    | 908         | (618,1102)    | 1,067       | (729,1198)    | 953         | (672,1126)    | 935              | (774,1059)    |             |
|              | Out-of-Pocket | 769            | (509,1123)    | 794         | (580,1273)    | 908         | (499,1328)    | 778         | (449,1208)    | 822              | (675,1110)    |             |
|              | Total         | 2,467          | (1642,3400)   | 2,374       | (1682,3428)   | 3,030       | (1826,3938)   | 2,566       | (1625,3410)   | 2,640            | (2158,3271)   |             |
| Productivity | Abesteeism    | Initial Impact | 3,374         | (3194,3549) | 4,161         | (3959,4315) | 3,994         | (3818,4496) | 2,604         | (2333,2766)      | 3,647         | (3359,3944) |
|              |               | Multiplier     | 3,273         | (2975,3885) | 4,036         | (3678,4280) | 3,874         | (3570,4024) | 2,526         | (2245,2751)      | 3,538         | (3273,3735) |
|              | Presenteeism  | Initial Impact | 5,228         | (4833,5875) | 6,060         | (5585,6553) | 7,609         | (7299,8255) | 4,343         | (3624,4686)      | 6,058         | (5823,6472) |
|              |               | Multiplier     | 3,660         | (3358,4011) | 4,242         | (3885,4473) | 5,326         | (4834,5637) | 3,040         | (2752,3332)      | 4,240         | (3950,4525) |
|              | Total         | 15,534         | (14361,17321) | 18,500      | (17108,19622) | 20,803      | (19522,22414) | 12,514      | (10955,13536) | 17,484           | (16407,18678) |             |
| Carers       | Paid          | -              | -             | 84          | (51,126)      | 174         | (111,238)     | 103         | (26,157)      | 97               | (37,136)      |             |
|              | In-kind       | 395            | (191,602)     | 501         | (238,738)     | 795         | (530,1200)    | 1,091       | (744,1318)    | 677              | (395,1125)    |             |
|              | Total         | 395            | (191,602)     | 585         | (289,865)     | 968         | (642,1438)    | 1,193       | (771,1475)    | 774              | (432,1262)    |             |
| Grand Total  |               | 18,396         | (16387,21926) | 21,460      | (19320,24655) | 24,802      | (22521,28992) | 16,273      | (14097,19742) | 20,898           | (19393,23212) |             |

| Chronic Pelvic Pain (CPP) |               |                |               |             |              |             |               |             |               |             |               |             |
|---------------------------|---------------|----------------|---------------|-------------|--------------|-------------|---------------|-------------|---------------|-------------|---------------|-------------|
| Age range                 |               | 18-24          |               | 25-30       |              | 31-38       |               | 39+         |               | Total       |               |             |
| Health                    | Primary       | 1,290          | (938,1648)    | 565         | (340,931)    | 883         | (520,1088)    | 212         | (110,539)     | 819         | (625,1038)    |             |
|                           | Secondary     | 1,516          | (1105,1855)   | 1,912       | (1573,2393)  | 1,987       | (1544,2408)   | 2,273       | (1880,2577)   | 1,896       | (1534,2455)   |             |
|                           | Out-of-Pocket | 698            | (457,902)     | 315         | (156,579)    | 569         | (327,886)     | 253         | (126,551)     | 500         | (367,740)     |             |
|                           | Total         | 3,503          | (2501,4406)   | 2,791       | (2070,3904)  | 3,439       | (2392,4383)   | 2,738       | (2117,3668)   | 3,215       | (2528,4234)   |             |
| Productivity              | Abesteeism    | Initial Impact | 1,233         | (806,1573)  | 1,826        | (872,2418)  | 2,640         | (2,193)     | 1,555         | (1051,1975) | 1,976         | (1574,3208) |
|                           |               | Multiplier     | 1,196         | (872,1429)  | 1,771        | (845,2312)  | 2,561         | (2028,2959) | 1,508         | (1075,2046) | 1,917         | (1502,2600) |
|                           | Presenteeism  | Initial Impact | 3,896         | (3430,4832) | 3,348        | (2753,3932) | 6,894         | (5771,7979) | 5,772         | (4996,6744) | 5,233         | (4664,6120) |
|                           |               | Multiplier     | 2,727         | (2419,3828) | 2,343        | (1847,2714) | 4,826         | (4214,8953) | 4,040         | (3409,5301) | 3,663         | (2878,4530) |
|                           | Total         | 9,053          | (5108,7835)   | 9,287       | (7528,11663) | 16,920      | (6318,11378)  | 12,875      | (14222,20086) | 12,789      | (10533,16068) |             |
| Carers                    | Paid          | 247            | (68,471)      | 73          | (28,163)     | 81          | (25,135)      | -           | #VALUE!       | 108         | (36,187)      |             |
|                           | In-kind       | -              | -             | 136         | (65,254)     | 1,827       | (940,2699)    | 681         | (328,1319)    | 858         | (356,1311)    |             |
|                           | Total         | 247            | (68,471)      | 209         | (94,417)     | 1,908       | (965,2834)    | 681         | (328,1319)    | 966         | (392,1499)    |             |
| Grand Total               |               | 12,803         | (10097,16542) | 12,288      | (8483,15700) | 22,267      | (17580,27305) | 16,294      | (12979,21056) | 16,970      | (13540,22193) |             |
