# Supplementary material for: The cost of illness and economic burden of endometriosis and chronic pelvic pain in Australia: A national online survey
Source: PubMed Central journal article supplement (PMC6786587; doi:10.1371/journal.pone.0223316), 2019-10-10
Supplement: pone.0223316.s006.pdf [file pone.0223316.s006.pdf]

|                      | MINIMUM |             | MILD   |              | MODERATE |               | SEVERE |               |
|----------------------|---------|-------------|--------|--------------|----------|---------------|--------|---------------|
|                      | Int \$  | 95% CI      | Int \$ | 95% CI       | Int \$   | 95% CI        | Int \$ | 95% CI        |
| <b>HEALTH</b>        | 1,342   | (341,1804)  | 1,588  | (1133,1939)  | 2,301    | (1914,2640)   | 2,399  | (2004,2687)   |
| <b>OUT-OF-POCKET</b> | 472     | (120,877)   | 533    | (326,806)    | 946      | (624,1326)    | 923    | (583,1255)    |
| <b>PRODUCTIVITY</b>  | 1,553   | (793,1977)  | 10,554 | (7833,12522) | 13,792   | (11613,15291) | 19,378 | (17897,21036) |
| <b>CARER</b>         | 437     | (97,751)    | 386    | (179,740)    | 652      | (387,945)     | 1,286  | (1006,2631)   |
| <b>TOTAL</b>         | 3,805   | (1617,5410) | 13,063 | (9472,16009) | 17,692   | (14539,20203) | 23,987 | (21492,26744) |
